# Supplementary material for: Reversible binding and quantification of heparin and chondroitin sulfate in water using redox-stable biferrocenylene SAMs
Source: Royal Society of Chemistry journal article supplement (doi:10.1039/c3an36781a), 2013-01-01
Supplement: c3an36781a.pdf [file c3an36781a.pdf]

Electronic Supporting Information  
for

## Reversible binding and quantification of heparin and chondroitin sulfate in water using redoxstable biferrocenylene SAMs

Kun Chen<sup>a</sup>, Michael Schmittl,<sup>\*a</sup>

*Center of Micro- and Nanochemistry and Engineering  
Universität Siegen, Organische Chemie I, Adolf-Reichwein-Strasse 2, D-57068 Siegen,  
Germany*

### Table of Contents

|                                                                                               |          |
|-----------------------------------------------------------------------------------------------|----------|
| Chemicals                                                                                     | Page 1   |
| Stability of $\beta$ -(11-mercaptoundecyl)-BFD SAMs in Tris-Cl buffer solution                | Page 2   |
| Stability of $\beta$ -(11-mercaptoundecyl)-BFD SAMs in Tris-NO <sub>3</sub> buffer solution   | Page 2   |
| Linear relationship between anodic peak and scan rate in Tris-NO <sub>3</sub> buffer solution | Page 2   |
| Response of $\beta$ -(11-mercaptoundecyl)-BFD SAMs toward other biological anions             | Page 3-4 |
| Effect of scan rate on the binding of $\beta$ -(11-mercaptoundecyl)-BFD SAMs with heparin     | Page 5   |
| SPR measurements                                                                              | Page 6   |
| Electrochemical detection of heparin in blood plasma                                          | Page 7   |
| CV and SWV of $\beta$ -(11-mercaptoundecyl)-BFD SAMs in presence of chondroitin sulfate       | Page 8   |
| Titration curve of $\beta$ -(11-mercaptoundecyl)-BFD SAMs toward chondroitin sulfate          | Page 8   |
| Buffer solutions used for potential measurement in presence of different anions               | Page 9   |

### **Chemicals**

Chondroitin sulfate (mixture of 4- and 6-sulfate), hyaluronic acid, phytic acid sodium salt and bovine blood plasma (3.8% trisodium citrate as anticoagulant) were obtained from Sigma-Aldrich. Heparin (IU  $\geq$  100/mg), H<sub>2</sub>AMP and Na<sub>2</sub>H<sub>2</sub>ATP were purchased from Alfa Aesar.

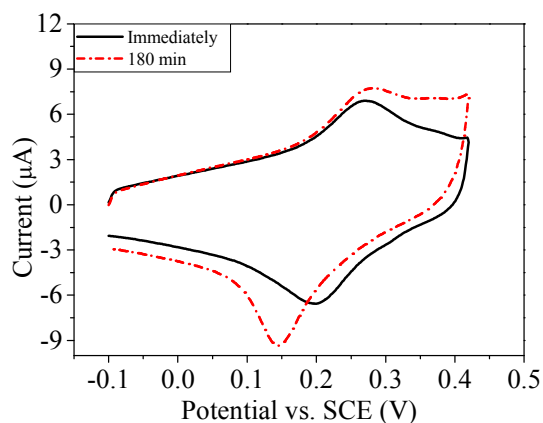

**Fig. S1** CV curves of  $\beta$ -(11-mercaptoundecyl)-BFD SAMs in Tris-Cl buffered solution ( $\text{pH} = 7.24 \pm 0.10$ , 0.01 M Tris-Cl, 0.1 M NaCl) immediately (black) after immersion and after 180 min of immersion (red). Scan rate = 100 mV/s.

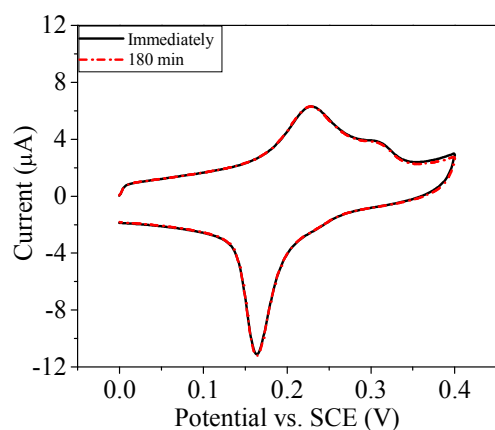

**Fig. S2** CV curves of  $\beta$ -(11-mercaptoundecyl)-BFD SAMs immersion in Tris-NO<sub>3</sub> buffered solution ( $\text{pH} = 7.24 \pm 0.10$ , 0.01 M Tris-NO<sub>3</sub>, 0.1 M NaNO<sub>3</sub>) immediately (black) after immersion and after 180 min of immersion (red). Scan rate = 100 mV/s.

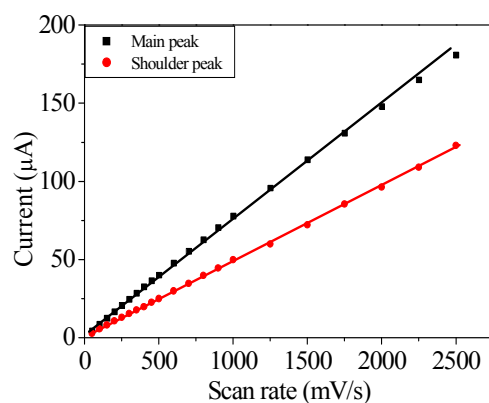

**Fig. S3** Linear relationship of the main anodic peak current (■) and shoulder anodic peak current (●) with scan rates of  $\beta$ -(11-mercaptoundecyl)-BFD SAMs in Tris-NO<sub>3</sub> buffer ( $\text{pH} = 7.24 \pm 0.10$ , 0.01 M Tris-NO<sub>3</sub>, 0.1 M NaNO<sub>3</sub>) from 25 mV/s to 2500 mV/s.

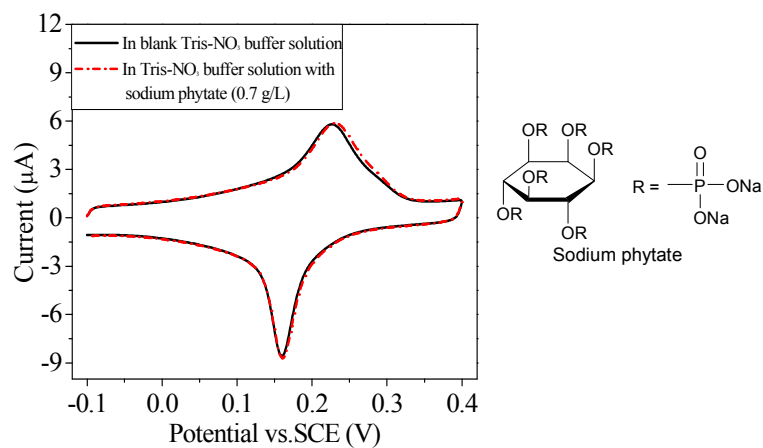

**Fig. S4** CV curves of  $\beta$ -(11-mercaptoundecyl)-BFD SAMs in absence (black) and presence of 0.7 g/L sodium phytate (red) in Tris-NO<sub>3</sub> buffer (pH = 7.24 ± 0.10, 0.01 M Tris-NO<sub>3</sub>, 0.1 M NaNO<sub>3</sub>). Scan rate = 100 mV/s

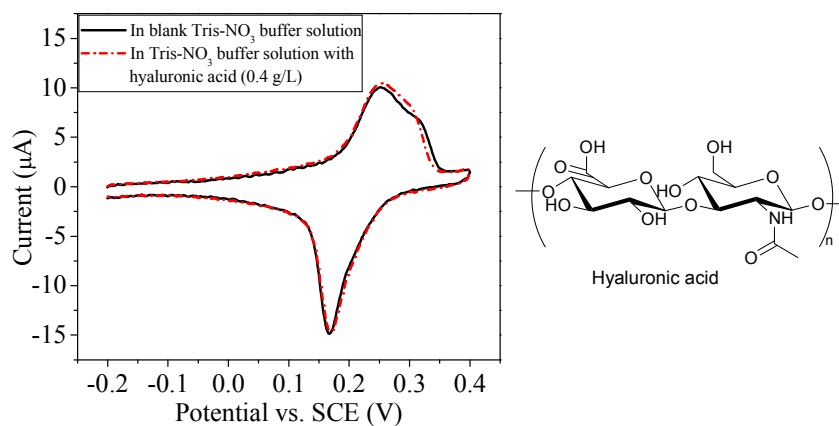

**Fig. S5** CV curves of  $\beta$ -(11-mercaptoundecyl)-BFD SAMs in absence (black) and presence of 0.4 g/L hyaluronic acid (red) in the Tris-NO<sub>3</sub> buffer (pH = 7.24 ± 0.10, 0.01 M Tris-NO<sub>3</sub>, 0.1 M NaNO<sub>3</sub>). Scan rate = 100 mV/s.

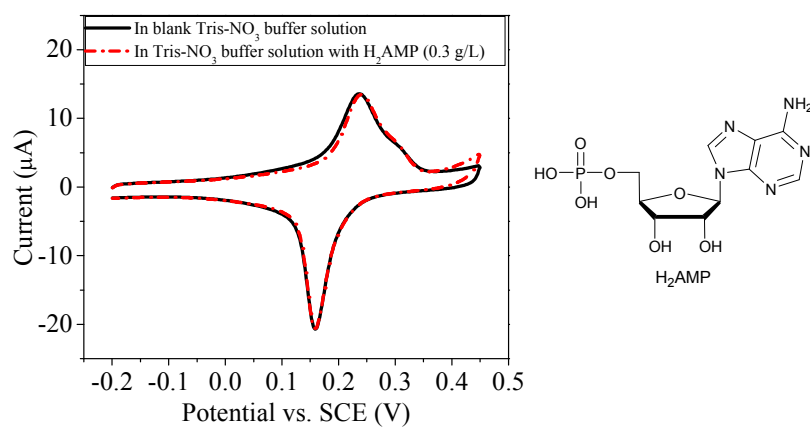

**Fig. S6** CV curves of  $\beta$ -(11-mercaptoundecyl)-BFD SAMs in absence (black) and presence of 0.3 g/L  $H_2AMP$  (red) in  $Tris-NO_3$  buffer ( $pH = 7.24 \pm 0.10$ , 0.01 M  $Tris-NO_3$ , 0.1 M  $NaNO_3$ ). Scan rate = 100 mV/s.

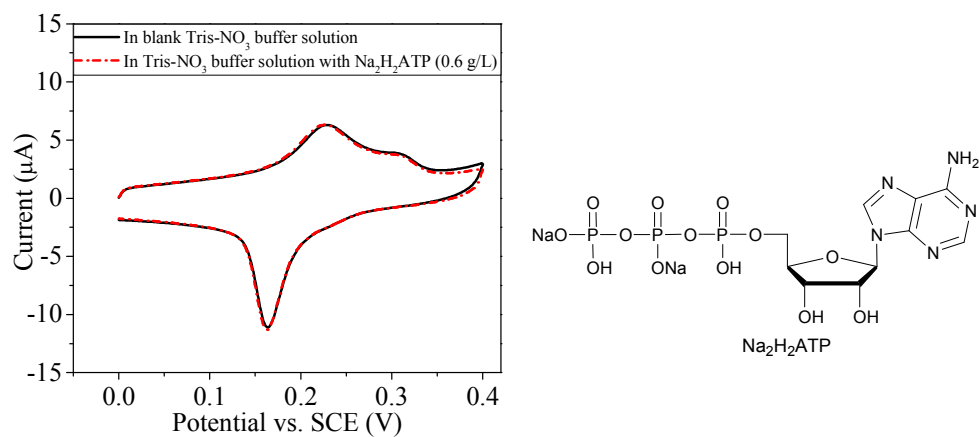

**Fig. S7** CV curves of  $\beta$ -(11-mercaptoundecyl)-BFD SAMs in absence (black) and presence of 0.6 g/L  $Na_2H_2ATP$  (red) in  $Tris-NO_3$  buffer ( $pH = 7.24 \pm 0.10$ , 0.01 M  $Tris-NO_3$ , 0.1 M  $NaNO_3$ ). Scan rate = 100 mV/s.

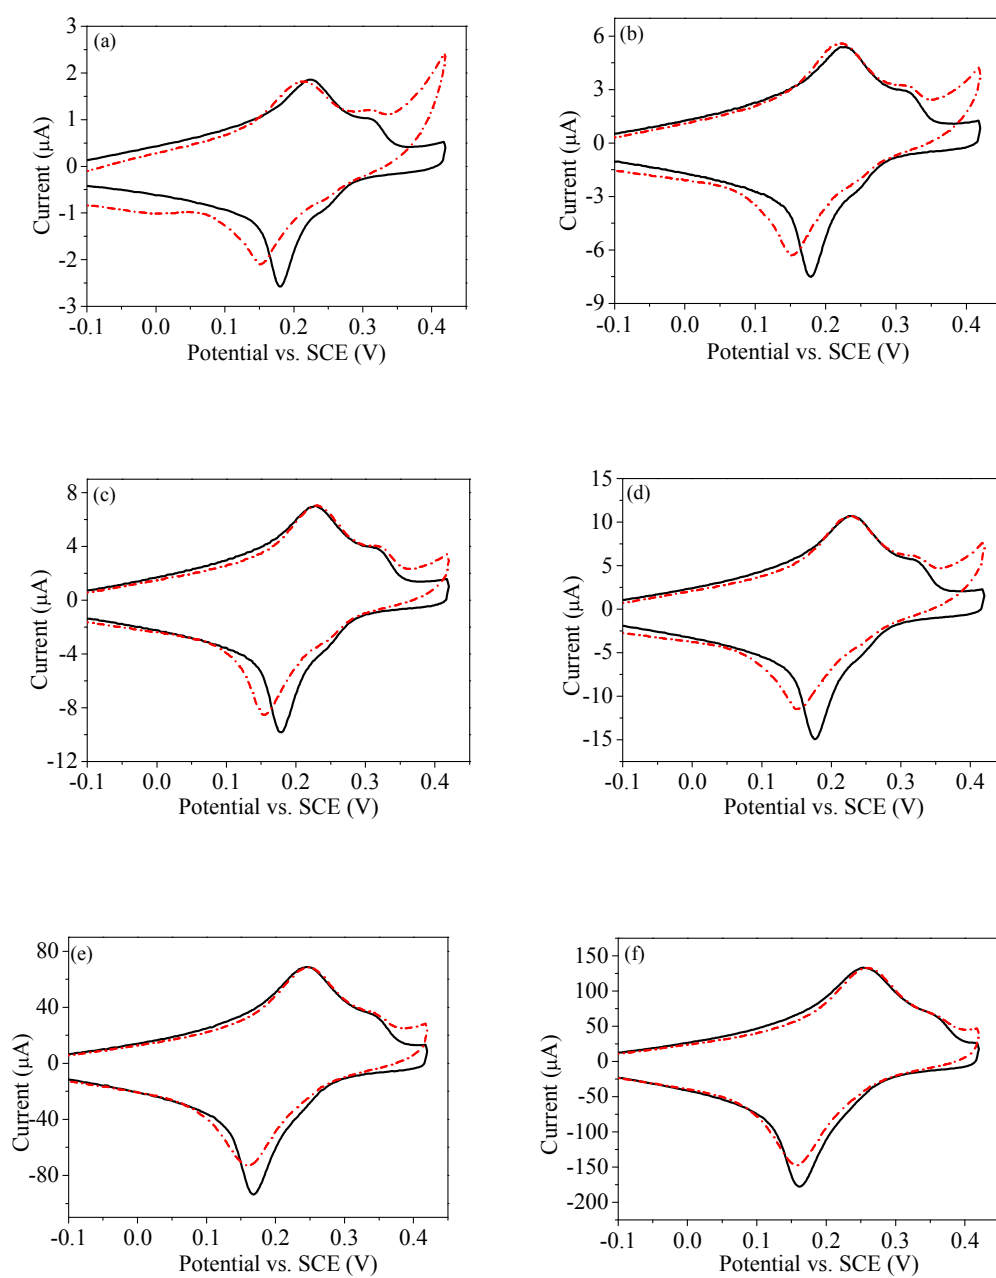

**Fig. S8** CVs of  $\beta$ -(11-mercaptoundecyl)-BFD SAMs in blank Tris-NO<sub>3</sub> buffer (black) and in Tris-NO<sub>3</sub> buffer +  $6.4 \times 10^{-3}$  g/L heparin (red) at different scan rates: (a) 25 mV/s; (b) 75 mV/s; (c) 100 mV/s; (d) 150 mV/s; (e) 1000 mV/s and (f) 2000 mV/s (pH =  $7.24 \pm 0.10$ , 0.01 M Tris-NO<sub>3</sub>, 0.1 M NaNO<sub>3</sub>).

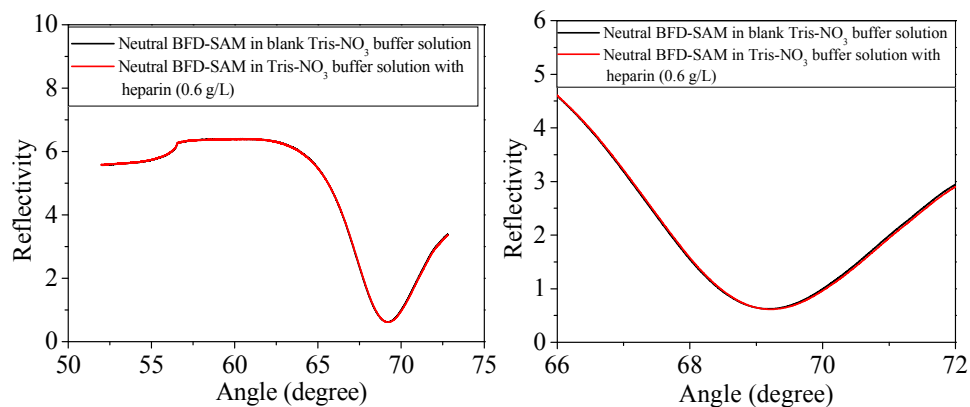

**Fig. S9** Left: SPR measurements of neutral of  $\beta$ -(11-mercaptoundecyl)-BFD SAMs in Tris-NO<sub>3</sub> buffer (pH = 7.24  $\pm$  0.10, 0.01 M Tris-NO<sub>3</sub>, 0.1 M NaNO<sub>3</sub>) with 0.6 g/L heparin (red) and without (black). Right: Enlarged picture of SPR measurements (Incident angle from 66° to 72°).

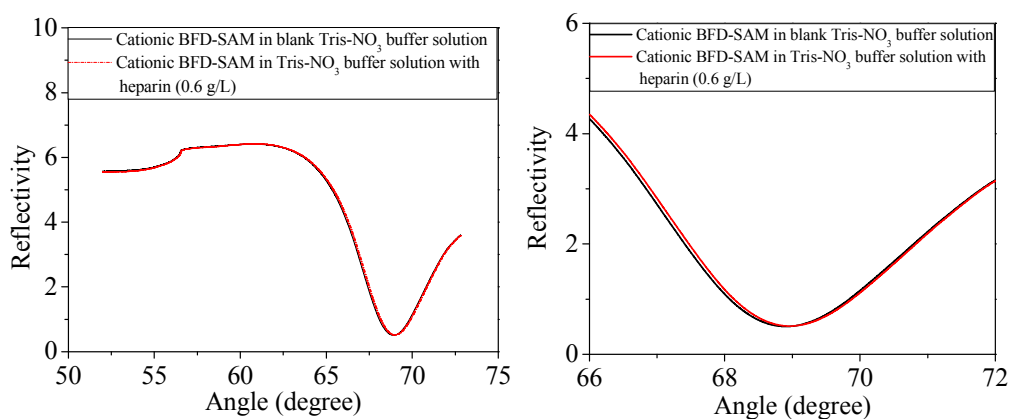

**Fig. S10** Left: SPR measurements of monooxidised  $\beta$ -(11-mercaptoundecyl)-BFD SAMs in Tris-NO<sub>3</sub> buffer (pH = 7.24  $\pm$  0.10, 0.01 M Tris-NO<sub>3</sub>, 0.1 M NaNO<sub>3</sub>) with 0.6 g/L heparin (red) and without (black). Right: Enlarged picture of SPR measurements (Incident angle from 66° to 72°).

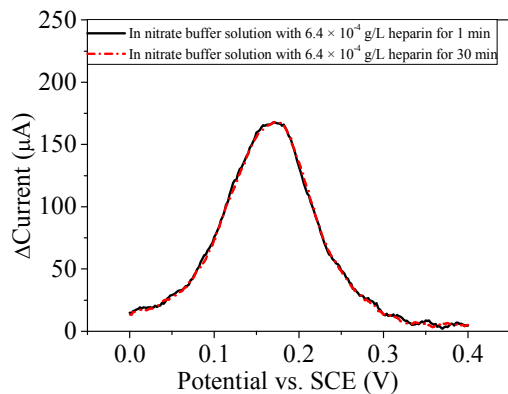

**Fig. S11** SWV curves of  $\beta$ -(11-mercaptopoundecyl)-BFD SAMs in Tris-NO<sub>3</sub> buffer (pH = 7.24 ± 0.10, 0.01 M Tris-NO<sub>3</sub>, 0.1 M NaNO<sub>3</sub>) in presence of heparin ( $6.4 \times 10^{-4}$  g/L) after 1 min (black) and 30 min of immersion (red).

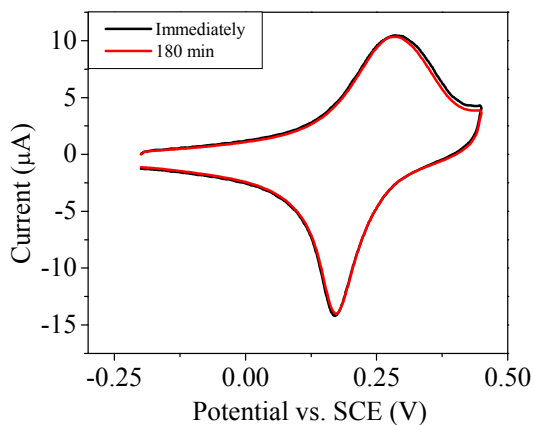

**Fig. S12** CV curves of a  $\beta$ -(11-mercaptopoundecyl)-BFD SAM immersed into a bovine plasma sample (diluted 50x by adding a Tris-NO<sub>3</sub> buffered solution): Scan rate = 100 mV/s; the black trace was recorded immediately after immersion and the red trace after 180 min of immersion. Buffer: pH = 7.24 ± 0.10, 0.01 M Tris-NO<sub>3</sub>, 0.1 M NaNO<sub>3</sub>.

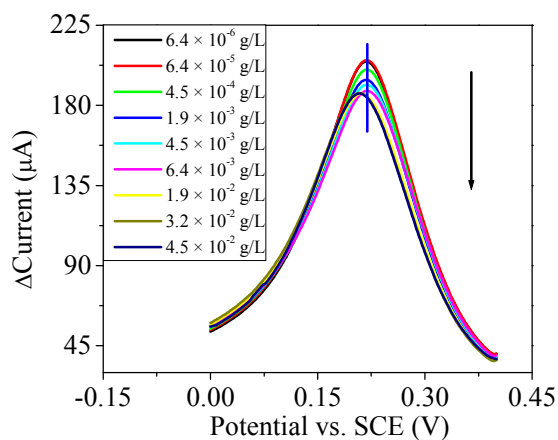

**Fig. S13** Cathodic SWV curves of a  $\beta$ -(11-mercaptopoundecyl)-BFD SAM upon generating defined concentrations of heparin in the diluted bovine plasma sample (for details, see caption of Fig. S12).

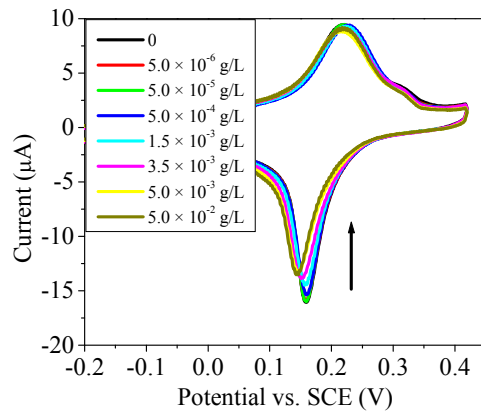

**Fig. S14** CV curves of  $\beta$ -(11-mercaptopundecyl)-BFD SAMs upon addition of various amounts of chondroitin sulfate in Tris- $\text{NO}_3$  buffer solution ( $\text{pH} = 7.24 \pm 0.10$ , 0.01 M Tris- $\text{NO}_3$ , 0.1 M  $\text{NaNO}_3$ ). Scan rate = 100 mV/s.

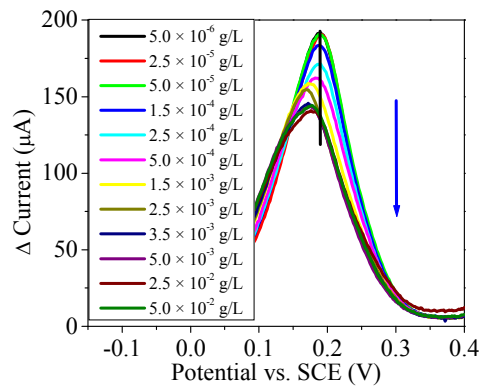

**Fig. S15** Cathodic SWV curves of  $\beta$ -(11-mercaptopundecyl)-BFD SAMs after addition of various amounts of chondroitin sulfate in the Tris- $\text{NO}_3$  buffer ( $\text{pH} = 7.24 \pm 0.10$ , 0.01 M Tris- $\text{NO}_3$ , 0.1 M  $\text{NaNO}_3$ ).

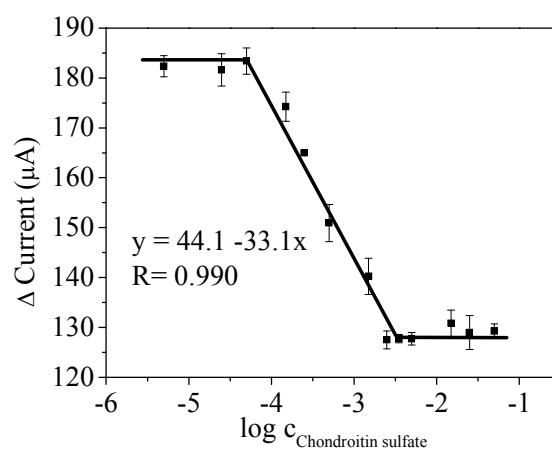

**Fig. S16** Titration curve for  $\beta$ -(11-mercaptopundecyl)-BFD SAMs and concentration of chondroitin sulfate in Tris- $\text{NO}_3$  buffer ( $\text{pH} = 7.24 \pm 0.10$ , 0.01 M Tris- $\text{NO}_3$ , 0.1 M  $\text{NaNO}_3$ ).  $\Delta$ Current vs. logarithm of  $c_{\text{Chondroitin}}$  (g/L) shows a good linear relationship from  $5.0 \times 10^{-5}$  g/L to  $2.5 \times 10^{-3}$  g/L.



**Table S1** The buffer solutions used for potential measurement in presence of different anions

| Buffer system         | Concentration of Tris | Acid              | pH          | Concentration of electrolyte |
|-----------------------|-----------------------|-------------------|-------------|------------------------------|
| Tris-PF <sub>6</sub>  | 0.01 M                | HPF <sub>6</sub>  | 7.24 ± 0.10 | 0.1M NaPF <sub>6</sub>       |
| Tris-BF <sub>4</sub>  | 0.01 M                | HBF <sub>4</sub>  |             | 0.1M NaBF <sub>4</sub>       |
| Tris-ClO <sub>4</sub> | 0.01 M                | HClO <sub>4</sub> |             | 0.1M NaClO <sub>4</sub>      |
| Tris-NO <sub>3</sub>  | 0.01 M                | HNO <sub>3</sub>  |             | 0.1M NaNO <sub>3</sub>       |
| Tris-Cl               | 0.01 M                | HCl               |             | 0.1M NaCl                    |
